# Supplementary material
Source: MDPI journal article supplement (https://www.mdpi.com/2072-4292/15/6/1510)
Supplement: s1 [file s1]

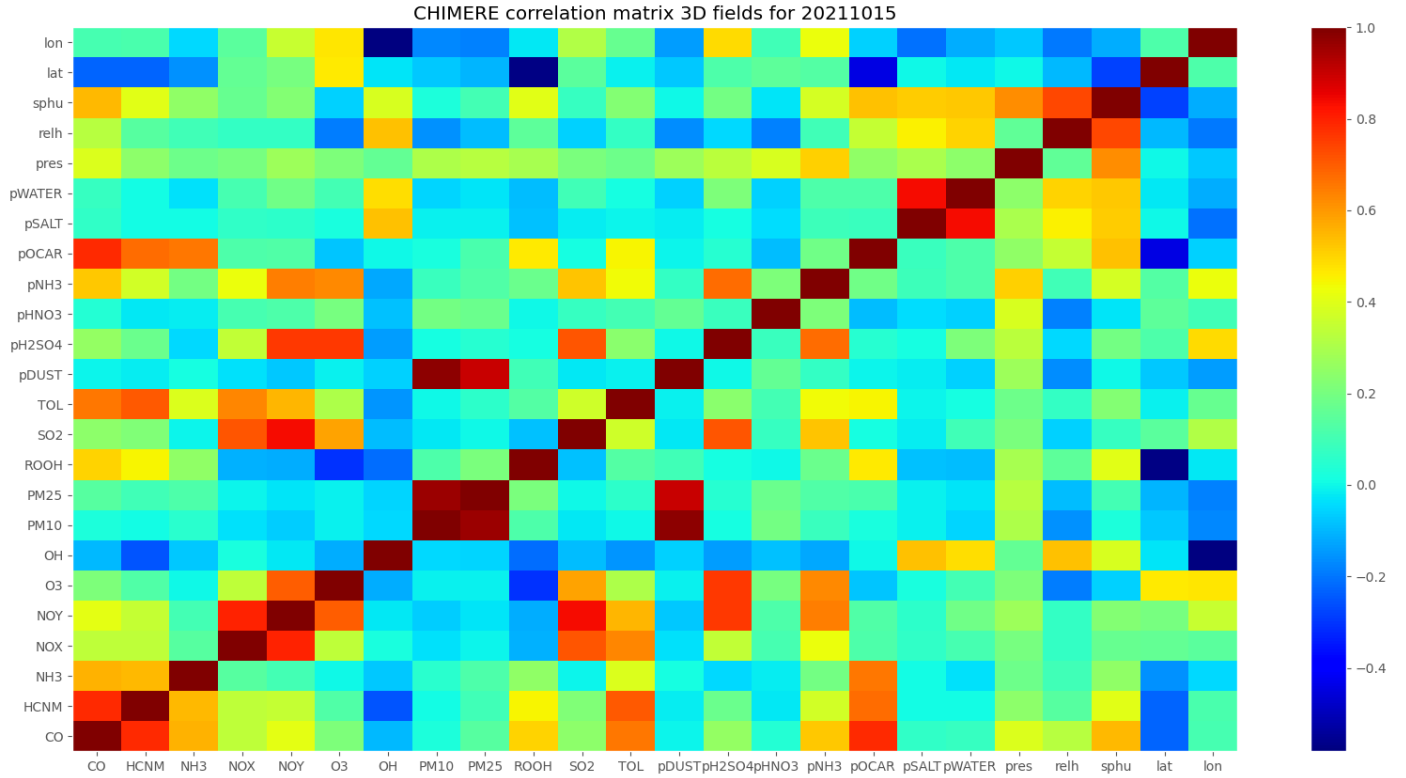

**Figure S2.** Correlation matrix of some variables from CHIMERE simulation output for a typical day (15 October 2021). The meaning of the variable : lon:Longitude, usta:Friction velocity. Lat:Latitude, wsta:Convection velocity, relh:Relative humidity, soim:Soil moisture, temp:Temperature, sreht:Surface relative humidity, winz:Zonal wind, pres:Pressure, winm:Meridional wind, sshf:Surface sensible heat flux, winw:Vertical wind, slhf:Surface latent heat flux, sphu:Specific humidity, copc:Convective precipitation, pNH3:Ammonium particles, lspc:Large scale precipitation, pHNO3:Nitrates particles, topc:Precipitation, TOL:Toluene, aerr:Aerodynamic resistance, albedo:Surface albedo, atte:Radiation attenuation factor, hght:Boundary layer height, swrd:Shortwave radiation flux.

**Table S1.** The network architecture search space.

| Hyperparameter        | Minimum Value | Maximum Value | Increment |
|-----------------------|---------------|---------------|-----------|
| Number of layers      | 10            | 50            | 10        |
| Number of perceptrons | 10            | 50            | 10        |
| Batch size            | 5000          | 20000         | 1000      |

**Table S2.** The best architecture for the NN regressor.

| Layer Type          | Output Shape | Number of Parameters |
|---------------------|--------------|----------------------|
| Batch normalization | 96           | 384                  |
| Dense               | 30           | 2910                 |
| Dense               | 20           | 620                  |
| Dense               | 10           | 210                  |
| Dense               | 1            | 11                   |
